# Supplementary material for: Official American Thoracic Society/Centers for Disease Control and Prevention/Infectious Diseases Society of America Clinical Practice Guidelines: Treatment of Drug-Susceptible Tuberculosis
Source: Oxford University Press journal article supplement (doi:10.1093/cid/ciw376), 2016-08-10
Supplement: ciw376_supplementary_data.zip [file ciw376_supplementary_data.zip]

Archive with 3 entries (3 files):
- ciw376supp_file3.pdf
- ciw376supp_file2.pdf
- ciw376supp_file1.pdf
